# Supplementary material
Source: Springer Nature journal article supplement (https://www.springermedizin.de/resource/supplementary/12874_2010_510_MOESM5_ESM.pdf/9432028)

**a) Stepwise**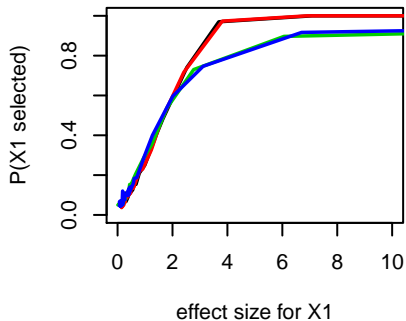**b) BMA 95 percent**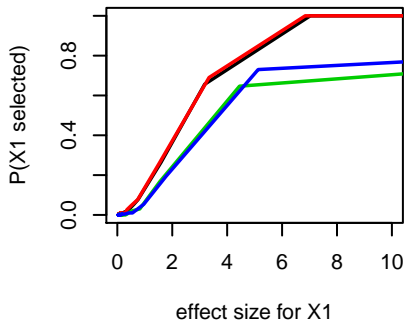**c) BMA 50 percent**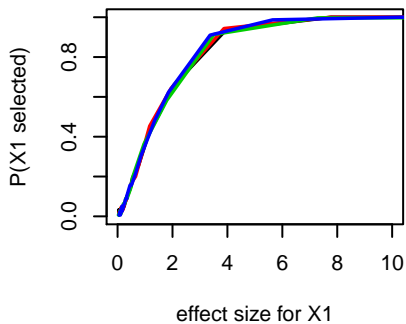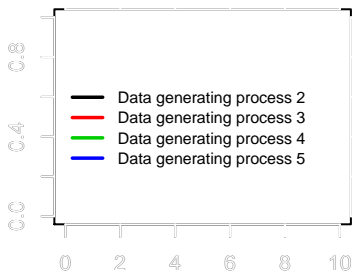

Supplement: MOESM5 [file 9432028]
